# Supplementary material
Source: PubMed Central journal article supplement (PMC4499140)
Supplement: supp_gkv516_nar-00499-v-2015-File010.pdf [file supp_gkv516_nar-00499-v-2015-File010.pdf]

Supplementary Table 1: Primers used in this study:

|                           |                                    |
|---------------------------|------------------------------------|
| <b>Rv1222 fw(NdeI)</b>    | GGATCCATATGGCCGACCCCGGAAGCGT       |
| <b>Rv1222 rv(HindIII)</b> | AAGCTTCTAGCGACGCACCCGCGATTG        |
| <b>Rv1222 rv(EcoRI)</b>   | ATGAATTCATGGCCGACCCCGGAAGCG        |
| <b>Rv1222 C70/73A fw</b>  | CCTTTCGCTGGCTGCCCAAGCCGCGGCCGAAG   |
| <b>Rv1222 C70/73A rv</b>  | CTTCGGCCGCGGCTTGGGCAGCCAGCGAAAGG   |
| <b>Rv1222 C109G fw</b>    | CCGAGATCCCGCGTGGTCCACCTGAAGG       |
| <b>Rv1222 C109G rv</b>    | CCTTCAGGTGGACCACGCGGGATCTCGG       |
| <b>Rv1222 A23C fw</b>     | CCCGGCGCAGTTCTGCTCCCAGAGTGAC       |
| <b>Rv1222 A23C rv</b>     | GTCACTCTGGGAGCAGAAGTGCGCCGGG       |
| <b>Rv1222 G133C fw</b>    | GGGCTGCGGCATGCTTCGGCGAC            |
| <b>Rv1222 G133C rv</b>    | GTCGCCGAAGCATGCCGCAGCCC            |
| <b>Rv1222ΔC fw</b>        | GCTTCGCTGACGGCTGATGGCGGGAATC       |
| <b>Rv1222ΔC rv</b>        | GATTCGCCCATCAGCCGTCAGCGAAGC        |
| <b>lacCONS fw</b>         | ATGGTACCTAGGCACCCAGGCTTG           |
| <b>lacCONS rv</b>         | ATGGATCCTGTGTGAAATTGTTATCCGC       |
| <b>DNA pol cy5 rv</b>     | GAAGGTGAAAGGCCTTTCG                |
| <b>abrB fw</b>            | AAGAATTCGTTTCCAAGACATTACTGACTATAAG |
| <b>abrB rv</b>            | TTCTCCTCCCAAGAGATACTTATTTG         |
| <b>Bpr fw</b>             | CGTCTGTTGGCCGGCG                   |
| <b>Bpr rv</b>             | CCCTTGTGGGTGCATCGG                 |
| <b>sinP3 fw</b>           | CAGCCAGAAGTCATACCG                 |
| <b>sinP3 rv</b>           | GCCAAGCTTGCATGCCT                  |
| <b>rrnA fw</b>            | TCTGGTACCTCGTGGAGAACCTGGTGAGTC     |
| <b>rrnA rv</b>            | TCTGGATCCTACGCCGCCAGCGTTCGT        |
| <b>sigE fw(EcoRV)</b>     | ATGATATCATGGAACCTCTCGGCGGACC       |
| <b>SigE rv(XhoI)</b>      | TACTCGAGTCAGCGAACTGGGTTGACGTG      |
| <b>T7 fw</b>              | CCCGCGAAATTAATACGACTCACTATAGGGG    |
| <b>T7 rv</b>              | GCTAGTTATTGCTCAGCGGTGGC            |
| <b>T7A1 fw</b>            | CGGAATTCGGATCCAGATCCCG             |
| <b>T7A1 rv</b>            | CCTTTTTTACAGGTTTATAACCC            |

**Supplementary Table 2: Templates used in this study:**

|                                                 |                                                                                            |                                                                                                                                                                                                                                                                                                                                                                               |
|-------------------------------------------------|--------------------------------------------------------------------------------------------|-------------------------------------------------------------------------------------------------------------------------------------------------------------------------------------------------------------------------------------------------------------------------------------------------------------------------------------------------------------------------------|
| <b>Tailed-template</b>                          | Used in <i>in vitro</i> transcription assay with Mtb RNAP <sub>core</sub>                  | CCTTGAGTTTCAGGCCGAAACAGCAATTTGGGGTACTGTCACGTTCCGGCTAGCCCTCCAGCCCCCCCCCGAACTCAAAGTCCGGCTTTGTCGTTAAACCCCATGACAGTGCAAGCCGATCGGGAGGTC                                                                                                                                                                                                                                             |
| <b>Bpr</b>                                      | Used in EMSA and <i>in vitro</i> transcription assay with RNAP- $\sigma^E$ holo            | TAGCCGTCTGTTGGCCGGCGTTCGGGTTGTCCGGCCACTGGCCACACTTCTCAGGACTTTCTCAGGTCTTCGGCAGATTCTGCACGTACAGGGCGTCAGATCACTGCTGGGTGGGAAC TCAAAGTCCGGCTTTGTCGTTAAACCCCATGACAGTGCAAGCCGATCGGGAGGTCGCTATGGCCGATGCACCCACAAGGG                                                                                                                                                                       |
| <b>lacCONS15</b>                                | Used in <i>in vitro</i> transcription assay with Ec RNAP- $\sigma^{70}$ holo.              | CACCCAGGCTTGACACTTTATGCTTCGGCTCGTATAATGTGTGGAATTGTGAGGAGAGGGCG GATAACAA TT TCACACAGG                                                                                                                                                                                                                                                                                          |
| <b>lacCONS</b>                                  | Used in <i>in vivo</i> reporter assay                                                      | TAGGCACCCAGGCTTGACACTTTATGCTTCGGCTCGTATAATGTGTGGAATTGTGAGCGGATAACAATTCACACAGG                                                                                                                                                                                                                                                                                                 |
| <b>sinP3</b>                                    | Used in <i>in vitro</i> transcription assay with Mtb RNAP- $\sigma^A$ holo (time kinetics) | CAGCCAGAAGTCATACCGTAAATCCTTTCTGAATGTGCTATAATATCACAAATTGCTCGATGAGAAACATGAA ACCGAATACGGATCCTCTAGAGTCGACCTGCAGGCATGCAAGCTTGGC                                                                                                                                                                                                                                                    |
| <b>rrnA</b>                                     | Used in <i>in vitro</i> transcription assay with Mtb RNAP- $\sigma^A$ holo                 | TCGTGGAGAACCTGGTGTGCTCGGTGCCGAGATCGAACGGGTATGCTGTTAGGCGACGGTCACCTATG GATATCTATGGATGACCGAACCTGGTCTTGACTCCATTGCCGGATTGTATTAGACTGGCAGGGTCGCCC CGAAGCGGGCGGAAACAAGCAAGCGTGTGTTTGAGAACTCAATAGTGTGTTGGTGGTTTCACATTTTT GTTGTATTTTTGGCCATGCTCTTGAATGCCCGTTGTCGGGGCGTGGCCGTTTGTGTTGTCAGGATATT CTAATAACCTTTGGCTCCCTTTTCAAAGGGAGTGTTTGGTTTTGTTTGGAGAGTTTGATCCTGGCTCAG GACGAACGCTGGCGGCGT |
| <b>abrB</b>                                     | Used in <i>in vitro</i> transcription assay with Bs RNAP.                                  | AAGAATTCGTTTTCCAAGACATTACTGACTATAAGAACTAATTCACAATCAATAGTAAACAAAATGATTG ACGATTATTGGAAACCTTGTTATGCTATGAAGTAAGGATTTTGTGCAATAATGACGAAGAAAAATATAAT TTAACAAAATAAGTATCTCTTGGGAGGAGAATGTTTATGAAATCTACTGGTATTGTACGTAAAGTTGATGA ATTAGGACGTGTAGTTATTCCTATCGGGATCCTT                                                                                                                      |
| <b>TEMPLATE for <i>in vitro</i> replication</b> | Used in <i>in vitro</i> replication assay with Klenow fragment                             | CGAAGTTGACTTTTCACTGGTTTTTCACTTAACAAAACAGAAGGGAAAAACGAAAGGCCTTTCA                                                                                                                                                                                                                                                                                                              |
| <b>Promoter-less DNA</b>                        | Used in anisotropy assay                                                                   | GTGAGTATCTCGCAGTCCGACGCGTTCGTTGGCCGCGTCCCCGCCGTGGATCAGTTTCGATCCGTCGTC AAGTGATCAGGTGGCTACGACACCCCGCTGGGCATCACCAATCCGCCATCGACGAGTTGCTGGACC GCGTCTCGAGCAAATACGCCCTCGTGATCTATGCGGCAAAGCGTGCCCGGCAGATCAACGACTACTACA ACCAGCTTGGCGAGGGCATCCTCGAATATGTCGGTCCGCTGGTTGAGCCGGGTTGCAAGAGAAGCCG TTGTCCATCGCGTTGCGCGAGATCCACGCCGATCTGCTCGAGCACACCGAGGGCGAGTAG                               |
| <b>T7</b>                                       | Used in <i>in vitro</i> transcription assay with T7 RNAP                                   | TTAATACGACTCACTATAGGGGAATTGTGAGCGGATAACAATTCCTCTAGAAATAATTTGTTTAAC TTTAGAAGGAGATATACATATGCACCATCATCATCATTCTTCTGGTCTGGTGCCACGCGGTTCTG GTATGAAAGAAACCGCTGCTGCTAAATTCGAACGCCAGCACATGGACAGCCAGATCTGGGTACCGA CGACGACGACAAGGCCATGGCTGATATCGGATCCGAATTCGAGCTCCGTCGACAAGCTTGGCGCCG CACTCGAGCACCACCACCACCACCTGAGATCCGGCTGCTAACAAAGCCCGAAAGGAAGCTGAGTT GGCTGCTGCCACCGCTGAGCAATACTAGC    |
| <b>T7A1</b>                                     | Used in <i>in vitro</i> transcription assay with EcRNAP <sub>holo</sub>                    | CGGAATTCGGATCCAGATCCCGAAAATTTACAAAAGAGTATTGTAAAGTCTAACCTATAGGATACTTA CAGCCATCGAGAGGGACACGGGCGAAGCTTGGATCGAATCGAAGAAGCTACTCGTAATTTACGGGTT ATAAACCTGTGAAAAAGG                                                                                                                                                                                                                   |

**Supplementary Table 3: List of vectors used in this study**

| Name of the vector   | Source                    | Resistance Marker |
|----------------------|---------------------------|-------------------|
| pAcYc Duet           | Novagen, USA              | Chloramphenicol   |
| pET Duet             | Novagen, USA              | Ampicillin        |
| pET 28a(+)           | Novagen, USA              | Kanamycin         |
| pUC19                | New England Biolabs, UK   | Ampicillin        |
| pBluescript II SK(+) | Agilent technologies, USA | Ampicillin        |
| pLAM12               | Addgene, USA              | Kanamycin         |
| pFPV mcherry         | Addgene, USA              | Ampicillin        |

**Supplementary Table 4: List of plasmids**

|                           |                 |
|---------------------------|-----------------|
| pETDuet- <i>rpoB-rpoC</i> | Banerjee et al. |
| pAcYc- <i>rpoA-sigE</i>   | This study      |
| pET28a-rv1222             | This study      |
| pAcYc-rv1222              | This study      |
| pAcYc-rv1222 $\Delta$ C   | This study      |
| pFPV-mcherryUV5           | This study      |
| pLAM12-Rv1222             | This study      |
| pUC19- <i>lacCONS</i>     | This study      |
| pET29a- <i>sigA</i>       | Banerjee et al. |
| pET30a- <i>sigE</i>       | Rodrigue et al. |
| pET16b- <i>rpoA</i>       | Rodrigue et al. |
| pBluescriptSK- <i>Bpr</i> | This study      |

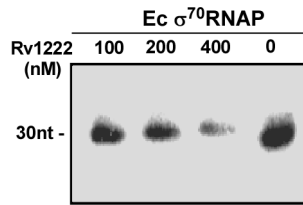

**Supplementary Figure 1:** Inhibition of transcription by Rv1222 purified from soluble fraction: Open complex was formed with 100nM Ec RNAP holo and 50nM *lacCONS* DNA. Rv1222 was added after open complex formation. Transcripts were produced using P<sup>32</sup> labelled NTPs.

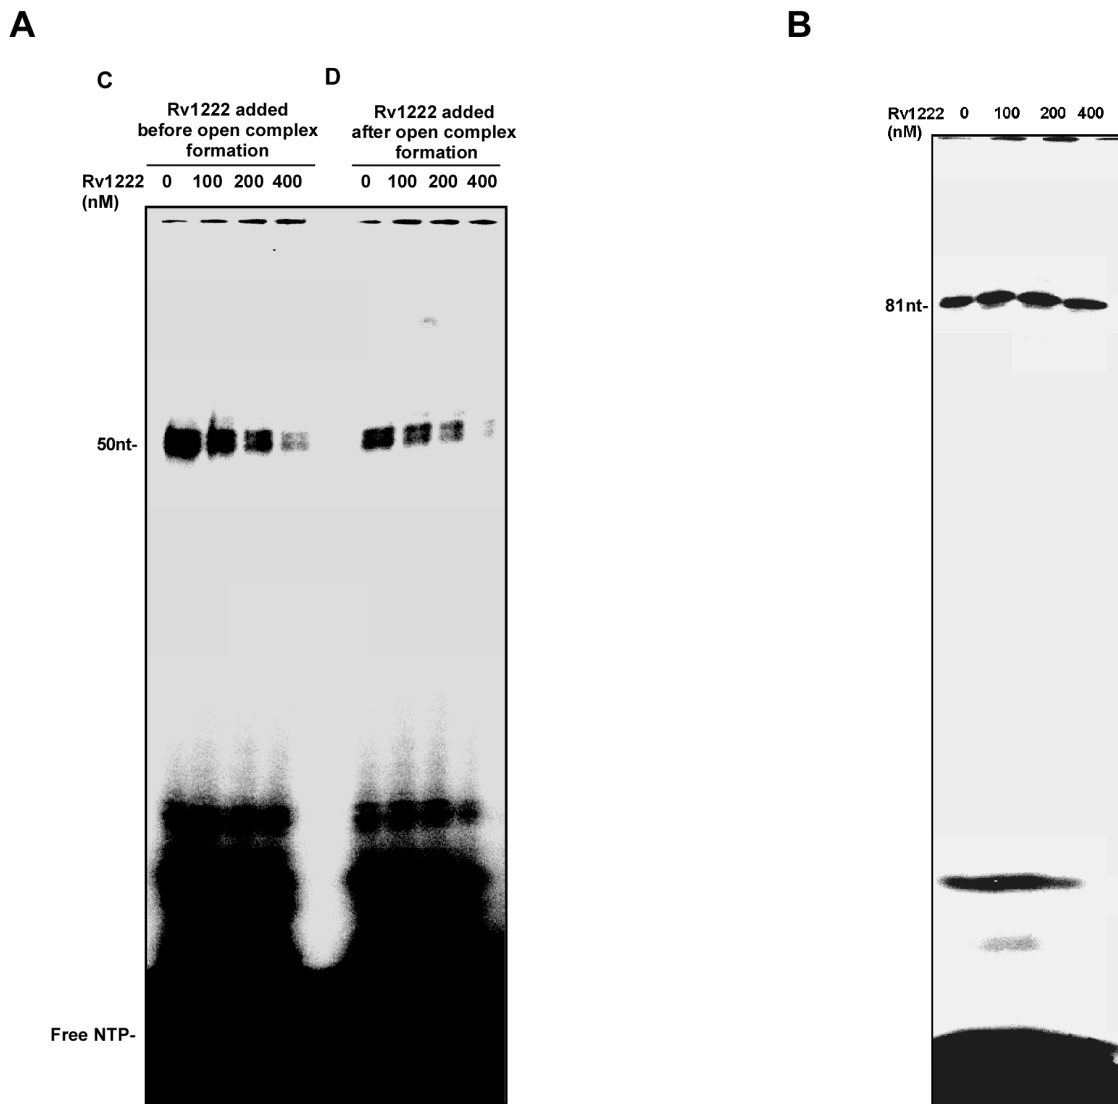

**Supplementary Figure 2A:** Full gel of SigE transcription assay with Rv1222.

**Supplementary Figure 2B:** Nuclease assay: P<sup>32</sup> labelled transcripts (81nt) were formed using *in vitro* transcription assay with 100nM Ec RNAP and 50nM *T7A1* template DNA. The samples were

treated with increasing concentrations of Rv1222 for 5mins at 37°C and loaded in denaturing PAGE and scanned by autoradiography.

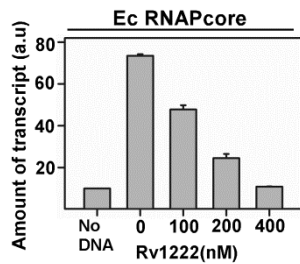

**Supplementary Figure 3:** *In vitro* transcription assay with 100nM Ec RNAP core, Rv1222 and 28ng Kool NC-45 template (14ng/μl) (Epicenter, USA). Lane 1: Control, no DNA. Lane 2-5: increasing concentrations of Rv1222. Rv1222 was incubated with the core enzyme before the open complex formation. RNA transcript produced were monitored by fluorescence with Ex at 490nm; Em at 530nm.

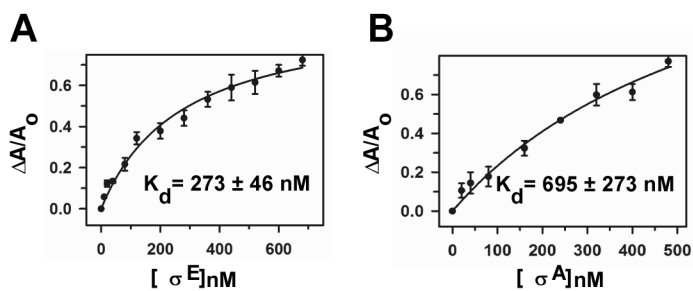

**Supplementary Figure 4:** Binding of TMR labelled Rv1222 (20nM) to Mtb σ<sup>E</sup> and Mtb σ<sup>A</sup>:Fluorescence anisotropy assay.

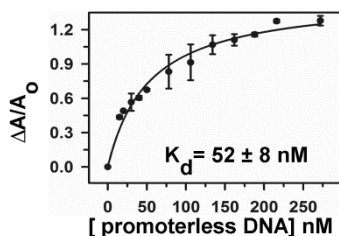

**Supplementary Figure 5:** Binding of TMR labelled Rv1222 (20nM) to promoter-less DNA fragment. Sequence of DNA was shown in Supplementary table 1.

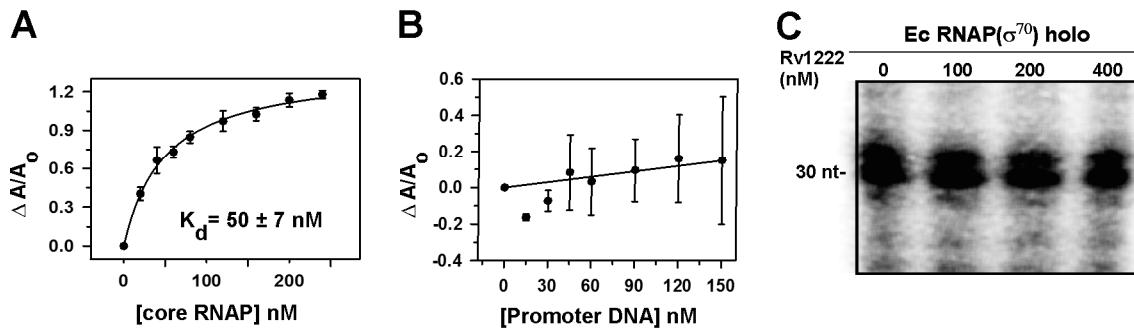

**Supplementary Figure 6: Effect of salt concentration on Rv1222 activity.**

**A.** Binding assay with RNAP: 20nM TMR labelled Rv1222 was titrated with Mtb RNAPcore in a transcription buffer containing 200mM KCl. Fluorescence anisotropy of the labelled protein were monitored at Ex 530 nm and Em 580 nm.

**B.** Binding assay with DNA: Same as A except Rv1222 was titrated with promoter DNA( *lacCONS* DNA).

**C.** *In vitro* transcription assay: Open complex was formed with 100nM Ec RNAP holo and 50nM *lacCONS* DNA in above transcription buffer and incubated with Rv1222 before transcription initiation.

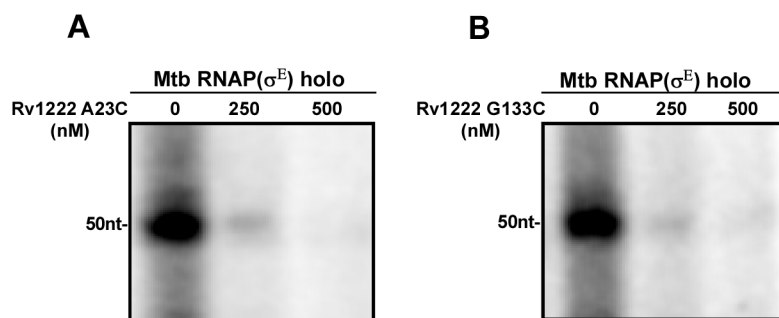

**Supplementary Figure 7: A.** *In vitro* transcription assay with Fe-BABE labelled Rv1222 derivatives. 100nM Mtb RNAP( $\sigma^E$ )holo and 50nM *Bpr* promoter DNA was used to form the open complex. Rv1222 derivatives was added and incubated for 30mins at 37°C followed by addition of NTP (125 $\mu$ M ATP, GTP, CTP, and 20  $\mu$ M  $\alpha^{32P}$ -CTP (0.4  $\mu$ Ci)). After 5 min, the reactions were terminated by addition of 2.5  $\mu$ l of FLB dye.

**A.** Result with Rv1222 A23C derivative.

**B.** Result with Rv1222 G133C derivative.

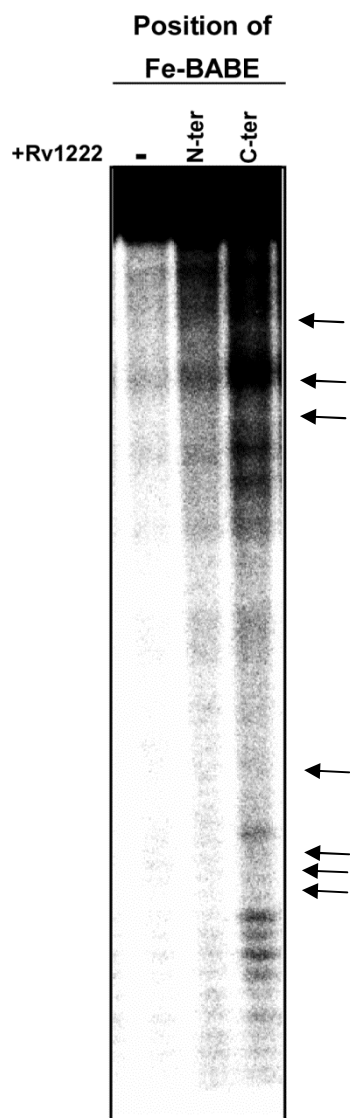

**Supplementary Figure 8:** DNA-Protein footprinting with Fe-BABE labelled Rv1222. Lane 1: No Rv1222; Lane 2: labelled Rv1222 at residue A23C (N-ter); Lane 3: labelled Rv1222 at residue G133C (C-ter). Arrows indicate the site of cleavage.

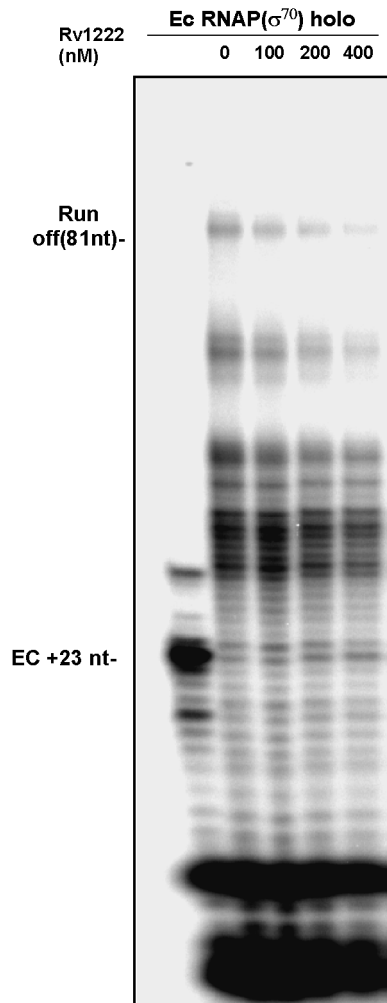

**Supplementary Figure 9:** Rv1222 inhibits transcription elongation. Stalled elongation complex (EC +23) were formed by *in vitro* transcription assay with 100nM Ec RNAP holo and 50nM *T7A1* promoter that had the first template-strand adenine residue at position +23, with 5  $\mu$ M of ATP, GTP and 2.5  $\mu$ M of  $\alpha^{32P}$ -CTP (0.2  $\mu$ Ci). After the formation of EC, the stalled complexes were incubated with increasing concentrations of Rv1222 for 10min at 37°C and chased with 5  $\mu$ M UTP for 5mins.
